# Supplementary material for: Mussel Mass Mortality and the Microbiome: Evidence for Shifts in the Bacterial Microbiome of a Declining Freshwater Bivalve
Source: Microorganisms. 2021 Sep 17;9(9):1976. doi: 10.3390/microorganisms9091976 (PMC8471132; doi:10.3390/microorganisms9091976)
Supplement: Supplementary file 1 [file microorganisms-09-01976-s001.zip › MS Tables for publication.xlsx]

## Sheet: Table S1
Accession	Short ID	Date	Location	Clincal Status	Densovirus Status	Length (mm)	Gravid
20180816SIAPE-0002	A10	2018-08-16	Sycamore Island	Control	Negative	96	Y
20180816SIAPE-0008	A16	2018-08-16	Sycamore Island	Control	Positive	95.7	N
20180816WBAPE-0007	A23	2018-08-16	Wallen's Bend	Control	Positive	91.6	N
20180816KFAPE-0002	A34	2018-08-16	Kyle's Ford	Control	Positive	99.4	N
20180816KFAPE-0006	A38	2018-08-16	Kyle's Ford	Control	Negative	83.8	N
20180925ARAPE-0004	B04	2018-09-25	Artrip	Control	Positive	95	Y
20180925SFAPE-0004	B17	2018-09-25	Speers Ferry	Control	Negative	85	Y
20180925SIAPE-0002	B26	2018-09-25	Sycamore Island	Control	Negative	92	Y
20180925SIAPE-0003	B27	2018-09-25	Sycamore Island	Control	Negative	97	Y
20180925SIAPE-0004	B28	2018-09-25	Sycamore Island	Control	Negative	91	Y
20180925SIAPE-0006	B31	2018-09-25	Sycamore Island	Control	Negative	104	N
20180925SIAPE-0007	B32	2018-09-25	Sycamore Island	Case	Negative	95	Y
20180925SIAPE-0011	B36	2018-09-25	Sycamore Island	Case	Positive	69	N
20180925SIAPE-0012	B37	2018-09-25	Sycamore Island	Case	Positive	91	N
20180925SIAPE-0014	B39	2018-09-25	Sycamore Island	Case	Positive	96	N
20180925SIAPE-0015	B40	2018-09-25	Sycamore Island	Case	Negative	101	Y
20180925WBAPE-0002	B44	2018-09-25	Wallen's Bend	Control	Negative	84.4	N
20180925KFAPE-0020	B71	2018-09-26	Kyle's Ford	Control	Negative	62	N
20180925KFAPE-0022	B73	2018-09-26	Kyle's Ford	Control	Negative	78	N
20180925KFAPE-0024	B75	2018-09-26	Kyle's Ford	Control	Positive	60	N
20181024ARAPE-0004	C04	2018-10-24	Artrip	Control	Positive	106	Y
20181024SFAPE-0001	C16	2018-10-24	Speers Ferry	Case	Negative	103	N
20181024SFAPE-0009	C28	2018-10-24	Speers Ferry	Case	Unk	94	Y
20181024SFAPE-0013	C33	2018-10-24	Speers Ferry	Control	Negative	82	N
20181025SIAPE-0002	C36	2018-10-25	Sycamore Island	Control	Positive	93	N
20181025SIAPE-0003	C37	2018-10-25	Sycamore Island	Control	Unk	89	N
20181025SIAPE-0012	C47	2018-10-25	Sycamore Island	Case	Positive	78	N
20181025SIAPE-0013	C48	2018-10-25	Sycamore Island	Case	Positive	86	Y
20181025SIAPE-0021	C59	2018-10-25	Sycamore Island	Case	Positive	97	N
20181025KFAPE-0001	C63	2018-10-25	Kyle's Ford	Control	Negative	70	N
20181025KFAPE-0002	C64	2018-10-25	Kyle's Ford	Control	Negative	88	Y
20181025KFAPE-0004	C66	2018-10-25	Kyle's Ford	Control	Positive	76	N
20181025KFAPE-0007	C69	2018-10-25	Kyle's Ford	Case	Positive	73	N
20181025KFAPE-0008	C70	2018-10-25	Kyle's Ford	Control	Negative	58	N
20181025KFAPE-0009	C71	2018-10-25	Kyle's Ford	Control	Negative	50	N
20181025KFAPE-0011	C73	2018-10-25	Kyle's Ford	Case	Positive	70	N
20181025KFAPE-0012	C74	2018-10-25	Kyle's Ford	Case	Positive	83	N
20181025KFAPE-0013	C75	2018-10-25	Kyle's Ford	Control	Negative	88	Y
20181025KFAPE-0014	C76	2018-10-25	Kyle's Ford	Case	Negative	88	Y
20181025KFAPE-0015	C77	2018-10-25	Kyle's Ford	Case	Positive	74.5	N
AP102017-005	Y05	2017-10-20	Sycamore Island	Control	Negative	104
AP102017-015	Y15	2017-10-20	Wallen's Bend	Control	Negative	84
AP102017-027	Y27	2017-10-20	Frost Ford	Control	Negative	89
AP102017-037	Y37	2017-10-20	Frost Ford	Case	Positive	96
AP102017-043	Y43	2017-10-20	Kyle's Ford	Case	Positive	97
AP102017-044	Y44	2017-10-20	Kyle's Ford	Control	Negative	85.5
AP102017-065	Y65	2017-10-20	Kyle's Ford	Case	Positive	90
AP102017-067	Y67	2017-10-20	Kyle's Ford	Case	Unk	90	Y
AP110317-001	Z01	2017-11-03	Kyle's Ford	Case	Positive	71
AP110317-002	Z02	2017-11-03	Kyle's Ford	Case	Positive	72
AP110371-003	Z03	2017-11-03	Kyle's Ford	Case	Negative	72
AP110317-005	Z05	2017-11-03	Kyle's Ford	Case	Positive	75
AP110317-006	Z06	2017-11-03	Kyle's Ford	Case	Negative	90
AP110317-008	Z08	2017-11-03	Kyle's Ford	Case	Negative	74
AP110311-009	Z09	2017-11-03	Kyle's Ford	Control	Negative	94
AP110311-010	Z10	2017-11-03	Kyle's Ford	Control	Positive	61
AP110311-013	Z13	2017-11-03	Wallen's Bend	Control	Positive	61
AP110311-015	Z15	2017-11-03	Wallen's Bend	Control	Positive	84
AP110317-016	Z16	2017-11-03	Wallen's Bend	Case	Negative	80

## Sheet: Table S2
SV	Kingdom	Phylum	Class	Order	Family	Genus	Species	BLAST Top Hit	BLAST % Identity	BLAST e- value	Equal BLAST Hits
SV2	Bacteria	Proteobacteria	Gammaproteobacteria	Enterobacterales	Enterobacteriaceae	Salmonella	enterica	Yokenella Regensburgei	100	8e-132	Salmonella enterica (100%)
SV3	Bacteria	Firmicutes	Clostridia	Clostridiales	Clostridiaceae	Clostridium sensu stricto 1	chauvoei	Clostridium chauvoei	100	8e-132
SV4	Bacteria	Proteobacteria	Gammaproteobacteria	Aeromonadales	Aeromonadaceae	Aeromonas	salmonicida	Aeromonas hydrophila	100	8e-132	A. bivalvium, A. lacus, A. finlandensis, A. veronii, A salmonicida, A media, A jandaei, A tecta, A dhakensis (probably a dozen+ species with 100% matches)
SV5	Bacteria	Proteobacteria	Alphaproteobacteria	NA	NA	NA	NA	Emcibacter nanhaiensis	87.6	6e-78
SV6	Bacteria	Proteobacteria	Gammaproteobacteria	Burkholderiales	Comamonadaceae	Curvibacter	NA	Comamonas aquatica subsp. Rana	97.6	8e-122	Aquabacterium citratiphilum, Azoarcus olearius, Delftia litopenaei (97.63%)
SV7	Bacteria	Actinobacteriota	Actinobacteria	Corynebacteriales	Corynebacteriaceae	Corynebacterium	ureicelerivorans	Corynebacterium ihumii	100	2e-132	C. multifaciens, C. pilbarense (100%)
SV10	Bacteria	Actinobacteriota	Actinobacteria	Micrococcales	Micrococcaceae	Micrococcus	luteus	Micrococcus luteus	100	8e-132	M. cohnii, M. aloeverae, M. antarcticus, M. yunnanensis, M. endophyticus
SV14	Bacteria	Fusobacteriota	Fusobacteriia	Fusobacteriales	Fusobacteriaceae	Cetobacterium	NA	Fusobacterium mortiferum	95.63	6e-113	Cetobacterium somerae
SV16	Bacteria	Firmicutes	Clostridia	Clostridiales	Clostridiaceae	Clostridium sensu stricto 1	chauvoei	Clostridium chauvoei	99.6	4e-130
SV17	Bacteria	Cyanobacteria	Cyanobacteriia	Chloroplast	NA	NA	NA	Arthrospira platensis	87.11	8e-77	Limnoraphis robusta
SV18	Bacteria	Bacteroidota	Bacteroidia	Bacteroidales	Bacteroidaceae	Bacteroides	luti	Bacteroides luti	100	8e-132
SV25	Bacteria	Proteobacteria	Gammaproteobacteria	Pseudomonadales	Moraxellaceae	Moraxella	osloensis	Moraxella osloensis	100	2e-132
SV41	Bacteria	Deinococcota	Deinococci	Thermales	Thermaceae	Thermus	scotoductus	Thermus scotoductus	100	8e-132
SV69	Bacteria	Proteobacteria	Alphaproteobacteria	Sphingomonadales	Sphingomonadaceae	Sphingobium	lactosutens	Sphingobium naphthae	100	8e-132	Sphingobium abikonense, Sphingobium soli, Sphingobium lactosutens DS20, Sphingobium olei
SV81	Bacteria	Firmicutes	Bacilli	Lactobacillales	Streptococcaceae	Streptococcus	salivarius	Streptococcus thermophilus	100	3e-131	S. vestibularis, S. salivarium
SV91	Bacteria	Firmicutes	Clostridia	Peptostreptococcales-Tissierellales	Finegoldia	NA	NA	Finegoldia magna	100	3e-131
SV113	Bacteria	Proteobacteria	Gammaproteobacteria	Pseudomonadales	Moraxellaceae	Acinetobacter	bohemicus	Acinetobacter movanagherensis	100	8e-132
SV131	Bacteria	Proteobacteria	Alphaproteobacteria	Rhizobiales	Beijerinckiaceae	Methylocystis	NA	Methylocystis parvus OBBP	100	8e-132	M. echinoides, M. hirsuta
SV149	Bacteria	Actinobacteriota	Actinobacteria	Corynebacteriales	Corynebacteriaceae	Corynebacterium	matruchotii	Corynebacterium matruchotii	100	4e-130
SV152	Bacteria	Proteobacteria	Alphaproteobacteria	Rickettsiales	Mitochondria	NA	NA	Defluviimonas aestuarii	76.1	3e-42
SV171	Bacteria	Actinobacteriota	Actinobacteria	Corynebacteriales	Corynebacteriaceae	Corynebacterium	coyleae	Corynebacterium coyleae	100	2e-132
SV209	Bacteria	Proteobacteria	Gammaproteobacteria	Burkholderiales	Comamonadaceae	Comamonas	testosteroni	Comamonas testosteroni	100	8e-132	C. thiooxydans
SV543	Bacteria	Proteobacteria	Gammaproteobacteria	Burkholderiales	Neisseriaceae	Neisseria	perflava	Neisseria subflava	100	8e-132	N. cinerea, N. perflava

## Sheet: Table S3
			Prevalence (%)		Average % of microbiome when present		LefSe association
SV #	% of reads in rarafied dataset	Total Individuals with SV	Case (n = 23)	Control (n = 33)	Case	Control	Clinical Status	Densovirus Status
SV2	17.27	16	52.2	12.1	69.61	32.39	Case
SV3	16.69	33	60.9	57.6	22.98	32.06
SV4	2.91	12	47.8	3	14.9	0.49	Case
SV5	1.43	2	8.7	0	40.49	NA
SV6	2.98	19	52.2	21.2	3.96	16.52	Control
SV7	5.46	20	17.4	48.5	3.66	18.12	Control	Negative
SV10	2.39	18	21.7	39.4	1.13	9.96
SV14	0.43	5	17.4	3	6.12	0.15
SV16	0.35	6	13	9	5.06	1.68
SV17	4.02	15	0	45.5	NA	15.02	Control
SV18	0.35	6	21.7	3	4.19	0.08	Case
SV41	0.99	18	56.5	15.2	3.43	2.16	Case	Positive
SV69	0.25	6	0	18.2	NA	2.13	Control
SV131	0.19	3	13	0	3.74	NA	Case
SV152	0.15	6	0	18.2	NA	1.41	Control
SV171	0.11	6	0	18.2	NA	1	Control
SV543	0.04	6	0	18.2	NA	0.21	Control
SV25	0.57	11	17.4	21.2	2.61	3.05
SV81	0.59	13	26.1	21.2	3.36	1.9
SV91	1.07	12	8.7	30.3	20.84	2.01
SV113	0.56	4	13.04	3.03	6.27	12.2		Positive
SV209	0.08	7	17.3913	9.09091	0.75	0.62		Positive
SV149	0.31	5	8.69565	9.09091	0.06	5.79		Negative
